# Supplementary material for: Ethylene glycol-mediated rapid synthesis of carbon-coated ZnFe2O4nanoflakes with long-term and high-rate performance for lithium-ion batteries
Source: Royal Society of Chemistry journal article supplement (doi:10.1039/c7dt04789d), 2018-01-01
Supplement: c7dt04789d1.pdf [file c7dt04789d1.pdf]

## Supporting Information

### Ethylene glycol-mediated rapid synthesis of carbon-coated $\text{ZnFe}_2\text{O}_4$ nanoflakes with long-term and high-rate performance for lithium-ion batteries

Guoxin Gao,<sup>‡a,\*</sup> Lei Shi,<sup>‡a</sup> Shiyao Lu,<sup>a</sup> Ting Gao,<sup>b</sup> Zhaoyang Li,<sup>a</sup> Yiyang Gao,<sup>a</sup> Shujiang Ding<sup>a,c,\*</sup>

<sup>a</sup> Department of Applied Chemistry, School of Science, Xi'an Jiaotong University, Xi'an 710049, P. R. China

<sup>b</sup> Chengdu Galaxy Power Co., LTD, Chengdu 610505, P. R. China.

<sup>c</sup> School of Science, State Key Laboratory for Mechanical Behavior of Materials, Xi'an Jiaotong University, Xi'an 710049, P. R. China.

<sup>‡</sup> These authors contributed to this work equally.

\* Corresponding authors: [gaoguoxin@mail.xjtu.edu.cn](mailto:gaoguoxin@mail.xjtu.edu.cn) (G. X. Gao)  
[dingsj@mail.xjtu.edu.cn](mailto:dingsj@mail.xjtu.edu.cn) (S. J. Ding),

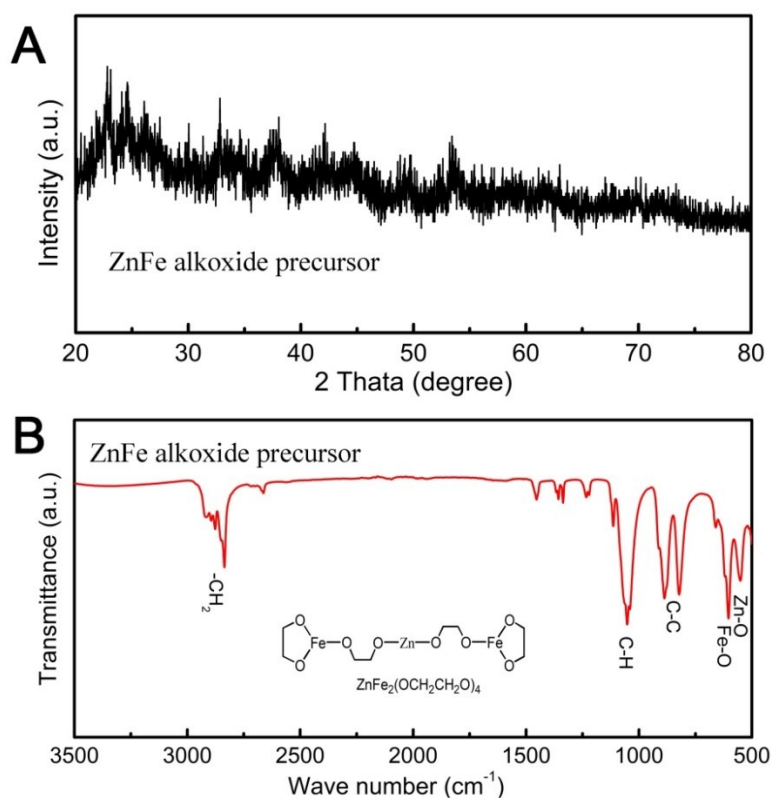

**Figure S1.** XRD pattern (A) and FT-IR spectra (B) of as-prepared ZnFe alkoxide precursor.

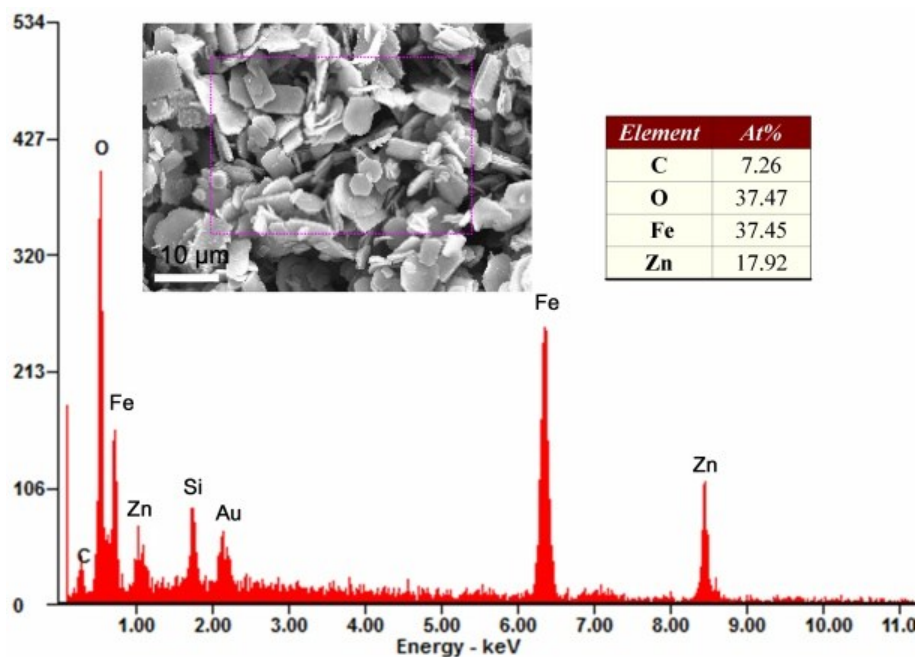

**Figure S2.** EDX spectra of as-prepared  $\text{ZnFe}_2\text{O}_4@\text{C}$  NFs, Inserted FESEM image shows the scan area.

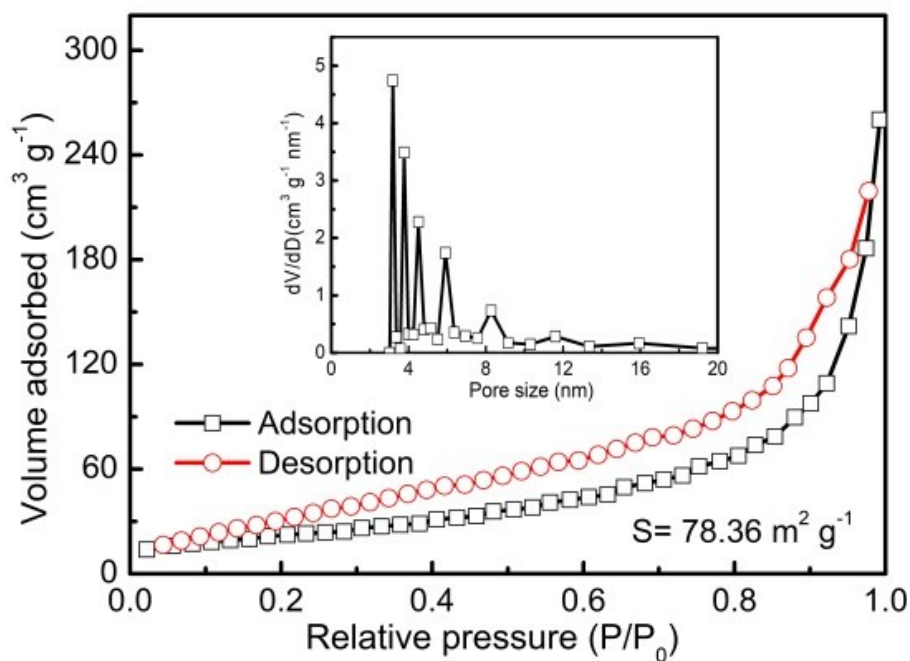

**Figure S3.**  $\text{N}_2$  adsorption-desorption isotherm of the as-prepared  $\text{ZnFe}_2\text{O}_4@\text{C}$  NFs. The inserted plots exhibit the pore size distribution curve according to BJH method.

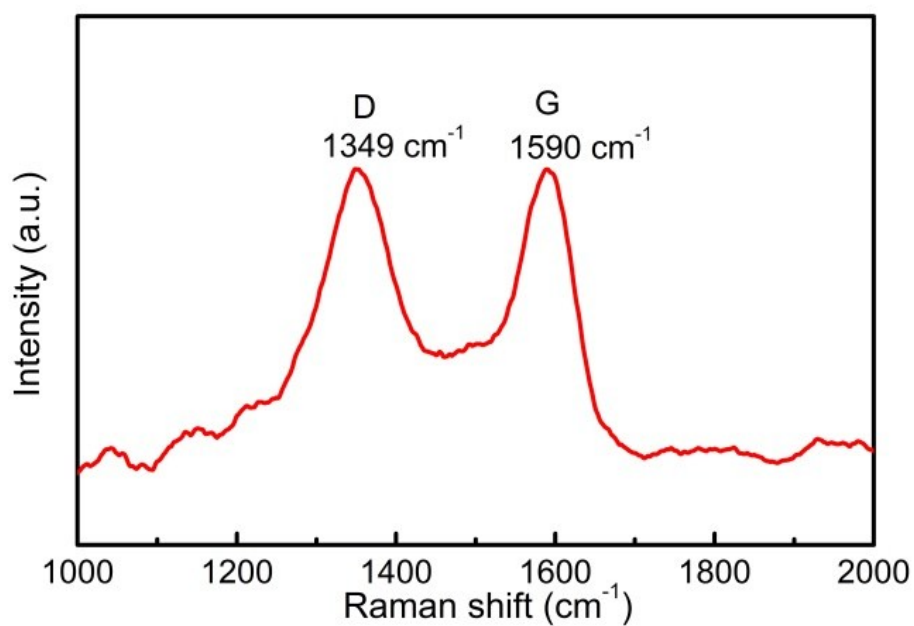

**Figure S4.** Raman spectra of as-prepared ZnFe<sub>2</sub>O<sub>4</sub>@C NFs.

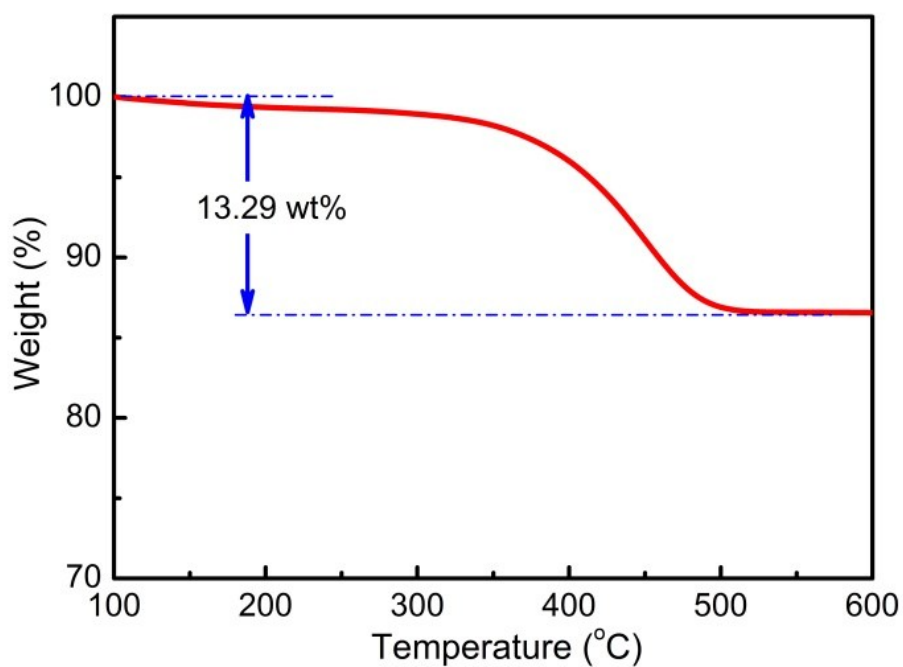

**Figure S5.** TGA profile of as-prepared ZnFe<sub>2</sub>O<sub>4</sub>@C NFs in air between 100 and 600 °C with a heating rate of 10 °C min<sup>-1</sup>.

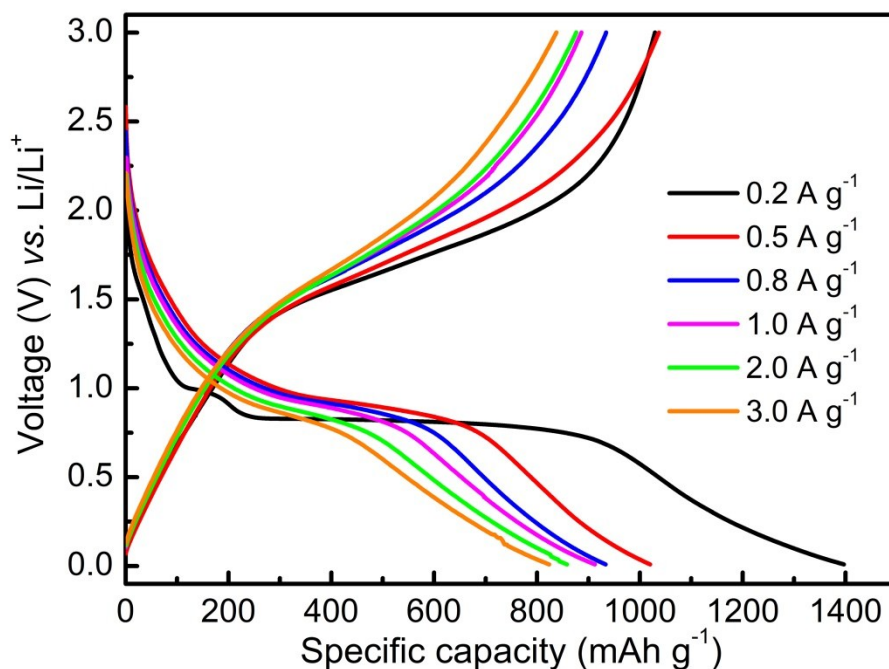

**Figure S6.** Discharge/charge voltage curves of as-prepared  $\text{ZnFe}_2\text{O}_4@\text{C}$  NFs at different current densities in the voltage window of 0.01 and 3.0 V.

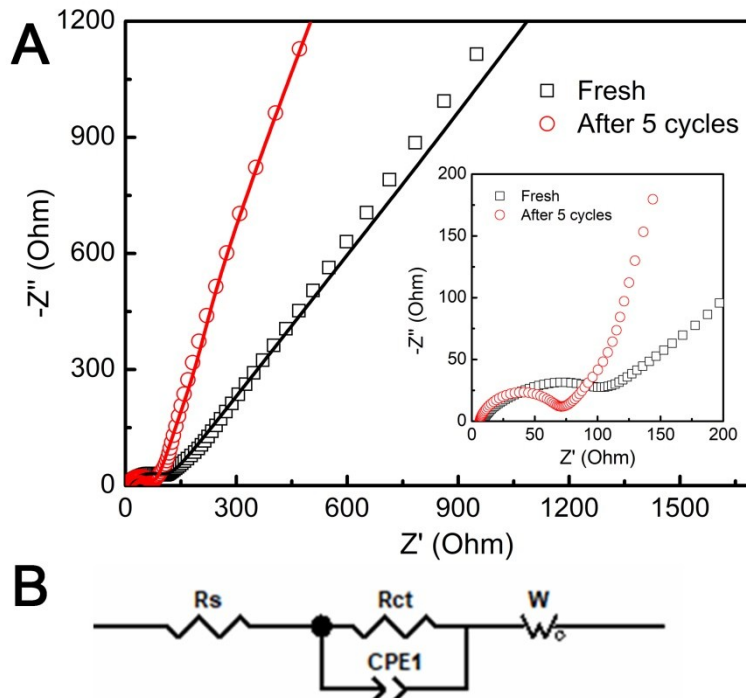

**Figure S7.** (A) Nyquist plots and (B) equivalent circuit of as-prepared  $\text{ZnFe}_2\text{O}_4@\text{C}$  NF electrodes measured with an amplitude of 5.0 mV over the frequency range of 100 kHz and 0.01 Hz by applying a sine wave.

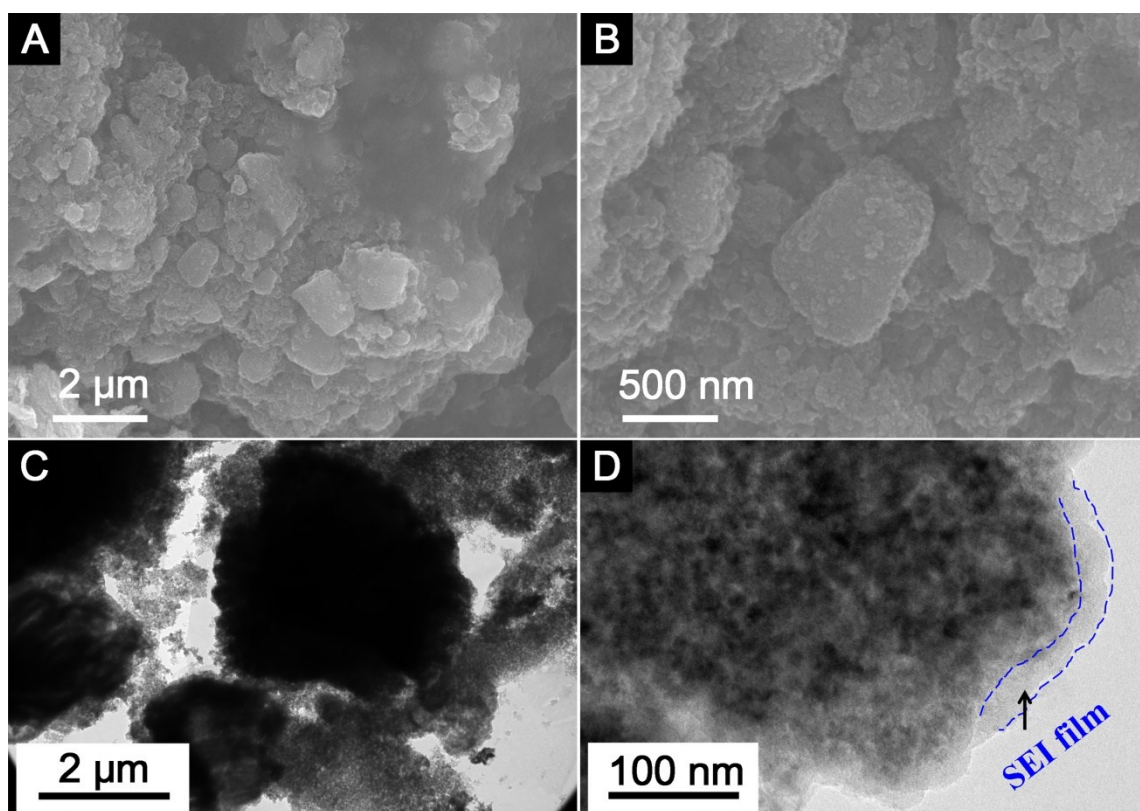

**Figure S8.** Post-mortem FESEM images of  $\text{ZnFe}_2\text{O}_4@\text{C}$  NFs after 1000 cycles at  $0.5 \text{ A g}^{-1}$ .
